# Supplementary material for: Muscle Proteomic and Transcriptomic Profiling of Healthy Aging and Metabolic Syndrome in Men
Source: MDPI journal article supplement (doi:10.3390/ijms22084205), 2021-04-19
Supplement: s1 [file s1]

2D gel electrophoresis image showing protein spots labeled with numbers. The x-axis represents pH (5 to 8) and the y-axis represents molecular weight (100 KDa to 10 KDa). The image shows a complex pattern of protein spots, with many labeled with numbers indicating specific protein spots.

Labels visible on the image include: 1930, 234, 355, 330, 347, 353, 340, 341, 350, 468, 496, 563, 1885, 620, 1866, 619, 561, 562, 1884, 1865, 714, 1856, 672, 1874, 677, 745, 683, 1857, 754, 658, 1896, 735, 1873, 1870, 1858, 748, 1826, 799, 1821, 885, 887, 815, 793, 1859, 1869, 837, 1825, 839, 850, 1842, 1846, 1821, 885, 887, 917, 1854, 1820, 893, 1841, 1845, 1876, 1879, 1822, 1902, 963, 937, 960, 928, 958, 962, 968, 2101, 1486, 1901.

**Figure S3.** Representative 2DGE image obtained from total protein extracts of human vastus lateralis skeletal muscle. 2DGE were performed using a pH range of 5-8. Protein loading was 700 µg, and gels were stained using colloidal Coomassie blue G-250. Differentially expressed and identified proteins are marked and spot numbers refer to Table 2.
