# Supplementary material for: Muscle Proteomic and Transcriptomic Profiling of Healthy Aging and Metabolic Syndrome in Men
Source: MDPI journal article supplement (doi:10.3390/ijms22084205), 2021-04-19
Supplement: s1 [file s1]

**Table S4.** Functional Class Scoring (FCS)

GeneTrail2 [50] was used to compare the entire lists of YO versus EL transcripts, and the entire lists of EL vs. SX transcripts.

| GO - Biological Process                                                  | YO vs. EL |           | EL vs. SX |           |
|--------------------------------------------------------------------------|-----------|-----------|-----------|-----------|
|                                                                          | Type      | Adj p-val | Type      | Adj p-val |
| apoptotic cell clearance                                                 | enriched  | 6.5E-03   |           |           |
| cell activation involved in immune response                              | enriched  | 9.4E-03   |           |           |
| positive regulation of cellular protein catabolic process                | depleted  | 1.3E-04   | enriched  | 2.4E-03   |
| regulation of cellular amino acid metabolic process                      | depleted  | 6.4E-05   | enriched  | 4.0E-04   |
| translational elongation                                                 | depleted  | 4.7E-04   | depleted  | 5.6E-26   |
| regulation of translation in response to stress                          | depleted  | 5.6E-03   |           |           |
| protein targeting to ER                                                  |           |           | depleted  | 1.6E-08   |
| mitochondrial transmembrane transport                                    | depleted  | 7.4E-03   | depleted  | 2.4E-04   |
| mitochondrial translation                                                | depleted  | 4.8E-11   | depleted  | 5.5E-17   |
| oxidative phosphorylation                                                | depleted  | 7.2E-07   | depleted  | 4.2E-18   |
| tricarboxylic acid metabolic process                                     | depleted  | 8.9E-03   | depleted  | 2.8E-03   |
| extracellular matrix assembly                                            | enriched  | 1.7E-03   |           |           |
| collagen fibril organization                                             |           |           | enriched  | 1.6E-03   |
| positive regulation of fat cell differentiation                          | enriched  | 1.2E-03   |           |           |
| regulation of lipase activity                                            |           |           | enriched  | 8.9E-03   |
| tumor necrosis factor superfamily cytokine production                    | enriched  | 8.9E-03   |           |           |
| regulation of transforming growth factor beta receptor signaling pathway | enriched  | 1.1E-03   |           |           |
| transforming growth factor beta receptor signaling pathway               |           |           | enriched  | 8.0E-03   |
