# Supplementary material for: Muscle Proteomic and Transcriptomic Profiling of Healthy Aging and Metabolic Syndrome in Men
Source: MDPI journal article supplement (doi:10.3390/ijms22084205), 2021-04-19
Supplement: s1 [file s1]

**A**

| Gene    | P            | r      |
|---------|--------------|--------|
| TNNT3   | <b>0.001</b> | 0.596  |
| CA3     | <b>0.001</b> | 0.577  |
| ECH1    | <b>0.001</b> | 0.570  |
| TNNT1   | <b>0.001</b> | 0.562  |
| FABP3   | <b>0.003</b> | 0.526  |
| ANKRD2  | <b>0.007</b> | 0.484  |
| MYL6B   | <b>0.008</b> | 0.478  |
| HSPB6   | <b>0.026</b> | 0.413  |
| TPI1    | <b>0.029</b> | 0.399  |
| MYL2    | <b>0.029</b> | 0.398  |
| PKM     | <b>0.036</b> | 0.398  |
| FBP2    | <b>0.041</b> | -0.395 |
| PYGM    | <b>0.047</b> | 0.366  |
| ENO3    | 0.069        | 0.336  |
| GAPDH   | 0.069        | 0.342  |
| CCT2    | 0.076        | -0.347 |
| ACADS   | 0.077        | 0.340  |
| PRDX2   | 0.083        | 0.321  |
| CFL2    | 0.100        | 0.318  |
| ALDH2   | 0.103        | 0.321  |
| HSPB1   | 0.181        | 0.251  |
| TRIM72  | 0.189        | -0.261 |
| USP14   | 0.205        | 0.247  |
| MYBPC1  | 0.230        | -0.244 |
| TNNC2   | 0.261        | -0.212 |
| ACTA1   | 0.262        | -0.228 |
| PSMB4   | 0.327        | 0.209  |
| CRYAB   | 0.416        | 0.154  |
| SOD2    | 0.451        | 0.151  |
| ANXA5   | 0.608        | -0.101 |
| MYOZ1   | 0.692        | -0.078 |
| CAPZA2  | 0.703        | 0.073  |
| GLOD4   | 0.751        | 0.064  |
| PTRF    | 0.776        | 0.058  |
| GOT1    | 0.776        | -0.060 |
| ALDH9A1 | 0.836        | 0.040  |
| PSMA1   | 0.866        | -0.032 |
| CKM     | 0.895        | -0.026 |
| ENO1    | 0.970        | 0.007  |

**B**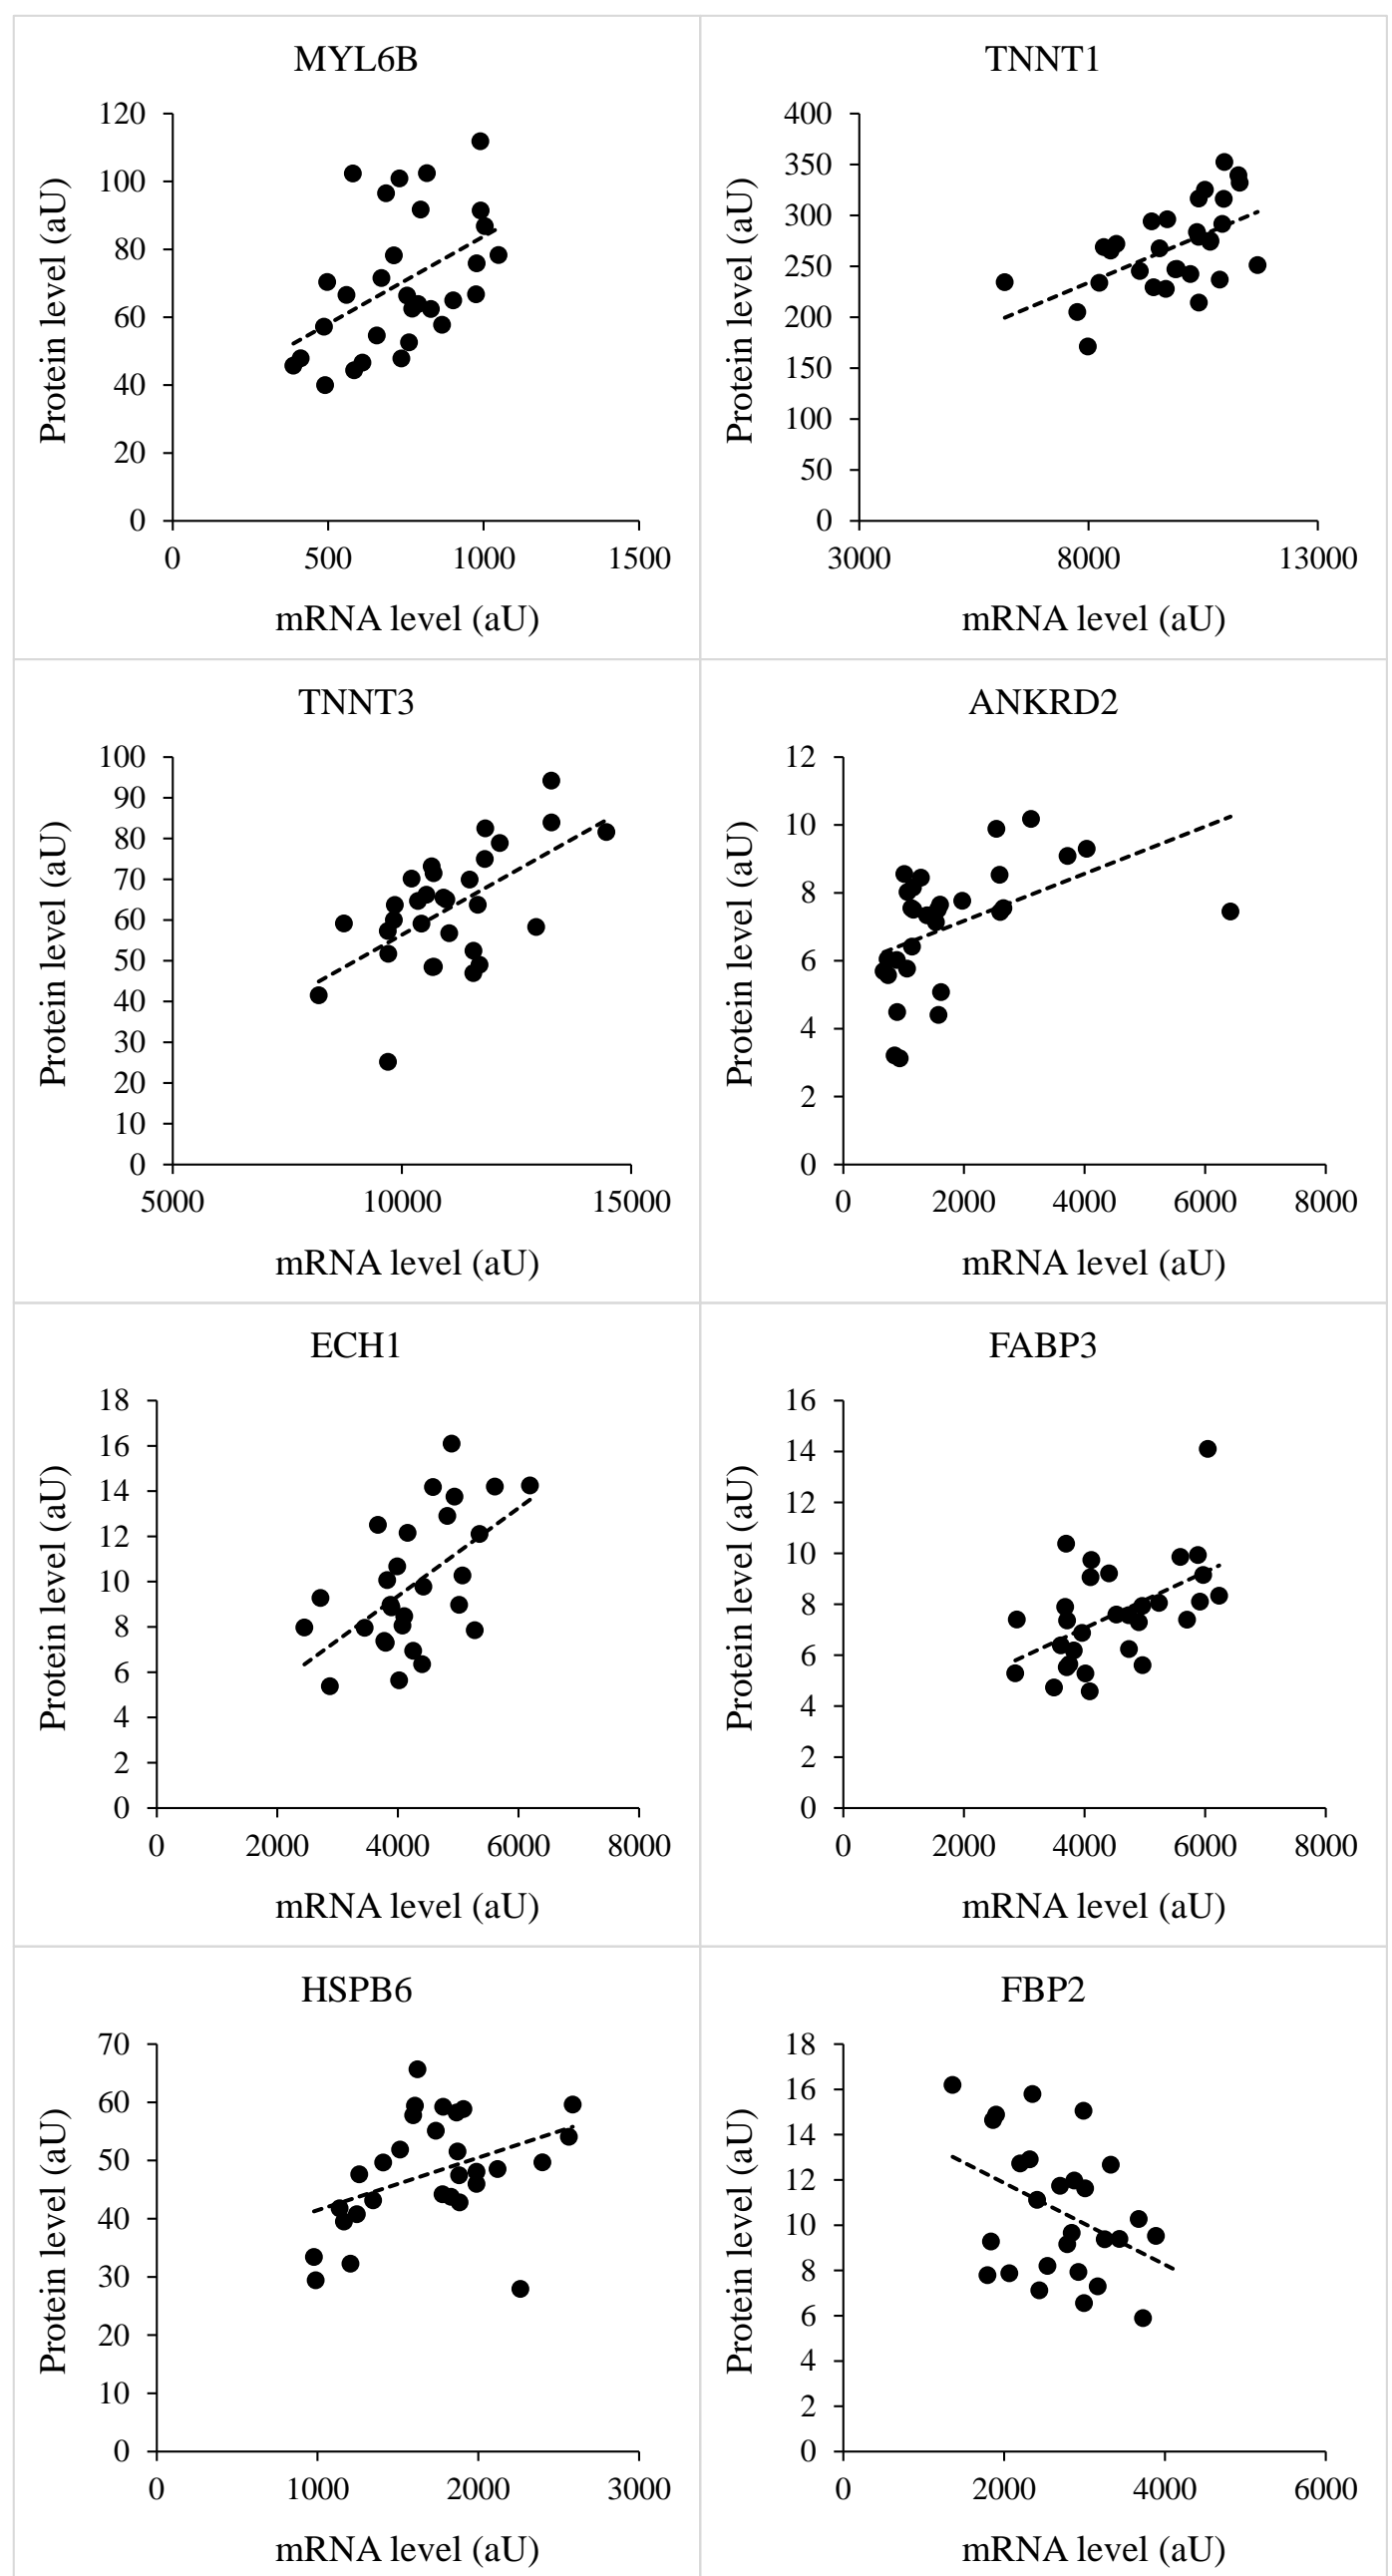

**Figure S4** Correlations between mRNA and protein levels. Linear Pearson's correlations were used to compare levels of mRNA and corresponding protein for  $n = 30$  muscle biopsies. (A) Pearson's correlation  $r$  and  $P$  values. (B) Examples of linear regressions. Protein names are listed in Table 2
