# Supplementary material for: Muscle Proteomic and Transcriptomic Profiling of Healthy Aging and Metabolic Syndrome in Men
Source: MDPI journal article supplement (doi:10.3390/ijms22084205), 2021-04-19
Supplement: s1 [file s1]

**Table S7.** Positional Gene Enrichment (PGE) for metabolic syndrome in old men. Muscle chromosomal regions significantly enriched in genes differentially expressed with metabolic syndrome

|            |         |                    |               |          |                |                    |                   |            | Enriched Region |                    |                      | chromosome<br>size (bp) | Differentially expressed genes |
|------------|---------|--------------------|---------------|----------|----------------|--------------------|-------------------|------------|-----------------|--------------------|----------------------|-------------------------|--------------------------------|
| Chromosome | band    | start of<br>region | end of region | p-value  | p-value<br>adj | Common<br>elements | Total<br>elements | Enrichment | size (bp)       | total size<br>(bp) | %bp of<br>chromosome |                         |                                |
| 1          | p34     | 35671678           | 38243830      | 0.001352 | 0.024448       | 3                  | 38                | 7.9%       | 2572152         |                    |                      |                         | FHL3 KIAAO319L MRPS15          |
| 1          | p33     | 47261827           | 51198524      | 0.00374  | 0.024448       | 2                  | 16                | 12.5%      | 3936697         | 6508849            | 2.7                  | 2.5E+08                 | CYP4X1 FAF                     |
| 2          | q11     | 159800558          | 160765009     | 0.000677 | 0.021324       | 2                  | 7                 | 28.6%      | 964451          |                    |                      |                         | ITGB6 WDSUB1                   |
| 2          | q24     | 97628953           | 105082849     | 0.02328  | 0.049437       | 2                  | 41                | 4.9%       | 7453896         | 8418347            | 3.5                  | 2.4E+08                 | COX5B MRPS9                    |
| 3          | q24     | 150374067          | 150578258     | 9.82E-05 | 0.009278       | 2                  | 3                 | 66.7%      | 204191          | 204191             | 0.1                  | 2.0E+08                 | CP TM4SF1                      |
| 4          | q25     | 107036054          | 113582216     | 0.00904  | 0.031114       | 2                  | 25                | 8.0%       | 6546162         | 6546162            | 3.4                  | 1.9E+08                 | ALPK1 NPNT                     |
| 5          | q13-q23 | 73958990           | 127553278     | 0.01058  | 0.033326       | 4                  | 148               | 2.7%       | 53594288        |                    |                      |                         | C5ORF13 ENC1 SLC12A2 THBS4     |
| 5          | q13-q23 | 73958990           | 79414866      | 0.016346 | 0.040651       | 2                  | 34                | 5.9%       |                 | 53594288           | 29.6                 | 1.8E+08                 | ENC1 THBS4                     |
| 6          | p23     | 13898999           | 15630232      | 0.000196 | 0.012324       | 2                  | 4                 | 50.0%      | 1731233         |                    |                      |                         | CCDC90A JARID2                 |
| 6          | q25     | 155096151          | 157572093     | 0.000325 | 0.015347       | 2                  | 5                 | 40.0%      | 2475942         | 4207175            | 2.5                  | 1.7E+08                 | ARID1B TIAM2                   |
| 7          | q32     | 127668567          | 132417390     | 0.013701 | 0.036472       | 2                  | 31                | 6.5%       | 4748823         | 4748823            | 3.0                  | 1.6E+08                 | CHCHD3 LEP                     |
| 8          | q24     | 124094769          | 125631401     | 0.004223 | 0.024939       | 2                  | 17                | 11.8%      | 1536632         | 1536632            | 1.1                  | 1.5E+08                 | DERL1 NDUF9                    |
| 10         | q23     | 99427171           | 100017997     | 0.000899 | 0.024279       | 2                  | 8                 | 25.0%      | 590826          | 590826             | 0.4                  | 1.4E+08                 | AVPI1 LOXL4                    |
| 11         | q14     | 82582939           | 94603894      | 0.002659 | 0.024448       | 3                  | 48                | 6.3%       | 12020955        |                    |                      |                         | ANKRD42 PRSS23 SESN3           |
| 11         | q14     | 82582939           | 86199917      | 0.003285 | 0.024448       | 2                  | 15                | 13.3%      |                 | 12020955           | 8.9                  | 1.3E+08                 | ANKRD42 PRSS23                 |
| 14         | q23     | 68325077           | 68515747      | 3.28E-05 | 0.006209       | 2                  | 2                 | 100.0%     | 190670          | 190670             | 0.2                  | 1.1E+08                 | ACTN1 ZFP36L1                  |
| 19         | p13     | 17323264           | 18149927      | 0.007681 | 0.031114       | 2                  | 23                | 8.7%       | 826663          | 826663             | 1.3                  | 6.4E+07                 | IFI30 PLVAP                    |
| X          | q28     | 152413591          | 153368194     | 0.020182 | 0.044874       | 2                  | 38                | 5.3%       | 954603          | 954603             | 0.6                  | 1.5E+08                 | BGN UBL4A                      |
