# Supplementary material for: Muscle Proteomic and Transcriptomic Profiling of Healthy Aging and Metabolic Syndrome in Men
Source: MDPI journal article supplement (doi:10.3390/ijms22084205), 2021-04-19
Supplement: s1 [file s1]

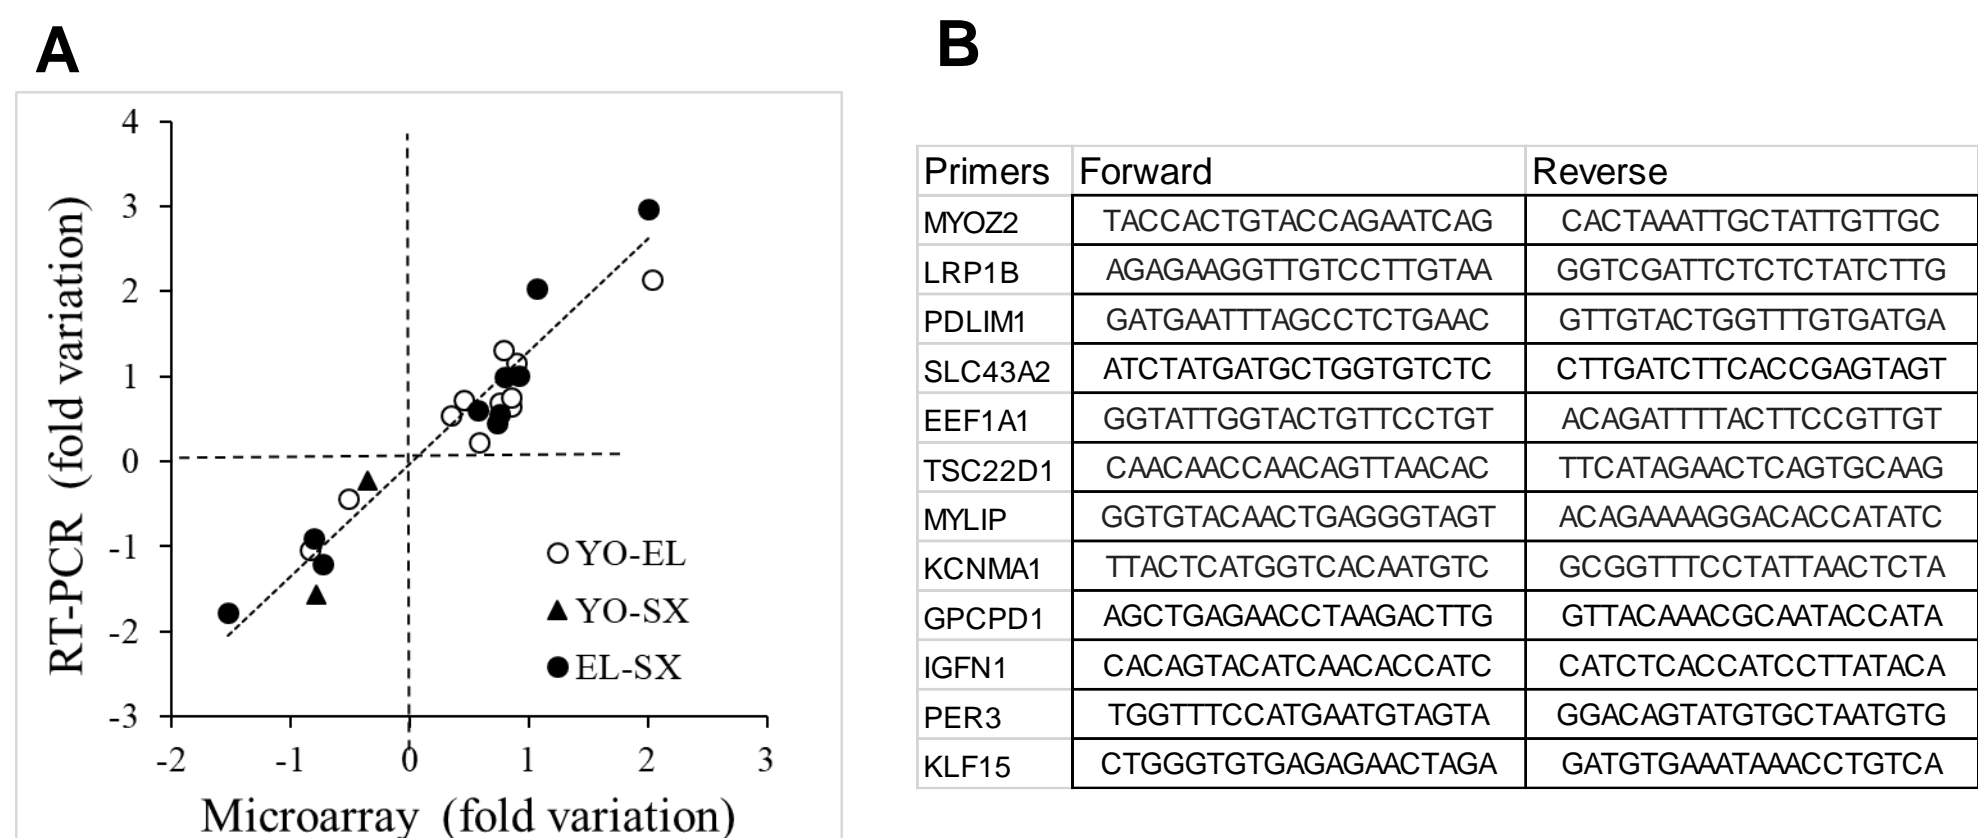

**Figure S2** Correlation between microarray and qRT-PCR on differential expression of 12 selected muscle genes. (A) Pearson’s correlation was  $r=0.96$  ( $P < 4.5 \times 10^{-13}$ ) for variations between healthy young (YO), healthy old (EL) and old men with metabolic syndrome (SX). (B) Sequence of primers used for qRT-PCR
