# Supplementary material for: Muscle Proteomic and Transcriptomic Profiling of Healthy Aging and Metabolic Syndrome in Men
Source: MDPI journal article supplement (doi:10.3390/ijms22084205), 2021-04-19
Supplement: s1 [file s1]

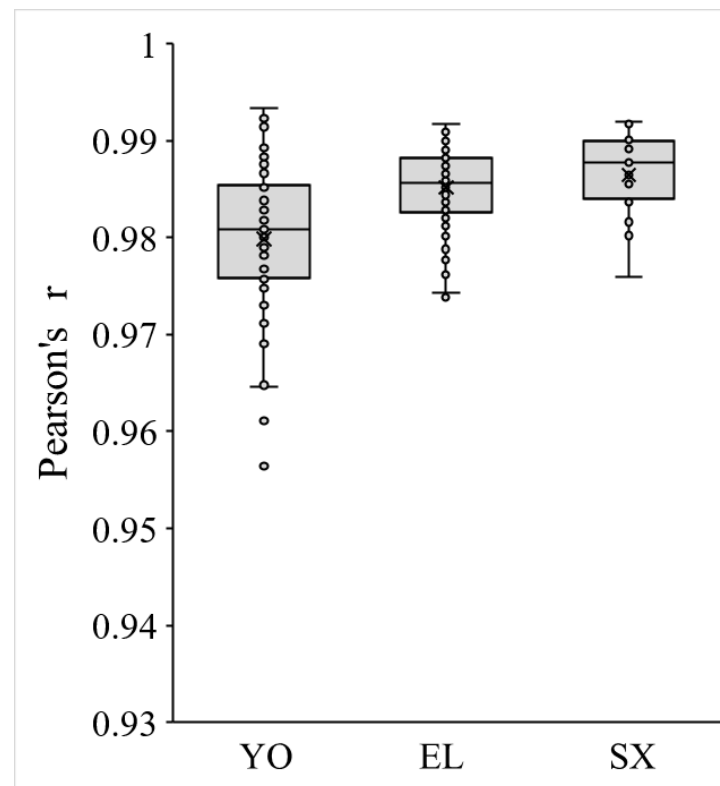

**Figure S1** Microarray biological replicates. Box-and-whisker plots of correlation coefficients (Pearson's  $r$ ) between biological replicates of muscle gene expression data for healthy young adults (YO), healthy old men (EL) and old men with metabolic syndrome (SX)
